# Supplementary material for: Probing the stability of sterically stabilized polystyrene particles by centrifugal sedimentation
Source: Royal Society of Chemistry journal article supplement (doi:10.1039/c3sm51534f), 2013-01-01
Supplement: c3sm51534f.pdf [file c3sm51534f.pdf]

## Supplementary Information (ESI) for Soft Matter

### Probing the stability of sterically-stabilized polystyrene particles by centrifugal sedimentation

Huai Nyin Yow\* and Simon Biggs

Institute of Particle Science & Engineering, School of Process, Environmental & Materials Engineering, University of Leeds, Leeds LS2 9JT, UK

\* Email: h.n.yow@leeds.ac.uk

#### S1. Determination of Compressive Yield Stress at Initial Conditions, $P_y(\phi_0)$

The initial compressive yield stress,  $P_y(\phi_0)$ , can be determined according to the approach of Buscall and White<sup>1,2</sup>, as proposed in Equation S1.

$$\left. \frac{dH}{dt} \right|_0 = -\frac{(1-\phi_0)u_0}{r(\phi_0)} \left( 1 - \frac{P_y(\phi_0)}{\Delta\rho g\phi_0 H_0} \right) \quad (\text{S1})$$

Where  $\left. \frac{dH}{dt} \right|_0$  is the initial rate of change of sediment height,  $\phi_0$  is the initial (uniform) volume fraction of particle dispersion,  $r(\phi_0)$  is the volume fraction dependent hindered settling factor, which is governed by  $r(\phi) \rightarrow 1$  as  $\phi \rightarrow 0$  and  $r(\phi) \rightarrow \infty$  as  $\phi \rightarrow 1$ ,  $u_0$  is the sedimentation rate of an isolated particle,  $P_y(\phi_0)$  is the compressive yield stress when volume fraction of particle dispersion is  $\phi_0$ ,  $\Delta\rho$  is the density difference between particle and liquid,  $g$  is the centrifugal acceleration at the bottom of the bed and  $H_0$  is the initial sediment height.

For an initial particle volume fraction of 0.05 (in our experiments), the influence of  $(1-\phi_0)/r(\phi_0)$  is approximated to be of order 1. For simplification,  $P_y(\phi_0)$  is represented as  $P_y$  subsequently. Therefore,

$$\left. \frac{dH}{dt} \right|_0 = -u_0 + \frac{u_0 P_y}{\Delta\rho g\phi_0 H_0}$$

Rearranging into a straight line equation ( $y = mx + c$ ) by multiplication with  $-\frac{1}{g}$  and plotting  $\left( -\frac{1}{g} \left. \frac{dH}{dt} \right|_0 \right)$  against  $(\Delta\rho g\phi_0 H_0)^{-1}$ ,

$$\begin{aligned} \left. \frac{dH}{dt} \right|_0 \left( -\frac{1}{g} \right) &= \frac{u_0}{g} - \frac{u_0 P_y}{\Delta\rho g\phi_0 H_0} \left( \frac{1}{g} \right) \\ \left. \frac{dH}{dt} \right|_0 \left( -\frac{1}{g} \right) &= \left( -\frac{P_y u_0}{g} \right) \frac{1}{\Delta\rho g\phi_0 H_0} + \frac{u_0}{g} \end{aligned} \quad (\text{S2})$$

Hence, Equation S2 can be plotted as a straight line of  $\left( -\frac{1}{g} \left. \frac{dH}{dt} \right|_0 \right)$  against  $(\Delta\rho g\phi_0 H_0)^{-1}$ , with y-axis intercept  $\frac{u_0}{g}$  (denoted as  $I$ ) and slope  $-\frac{P_y u_0}{g}$  (denoted as  $-IP_y$ ). As a result, the initial compressive yield stress,  $P_y(\phi_0)$ , can be determined accordingly.

<sup>1</sup> R. Buscall and L. R. White, *J. Chem. Soc. Faraday Trans 1*, 1987, **83**, 873-891.

<sup>2</sup> R. G. de Krester, D. V. Boger and P. J. Scales, *Rheol. Rev.*, 2003, 125-165.

## S2. Compressive yield stress data at equilibrium, $P_y(\theta_{eq})$

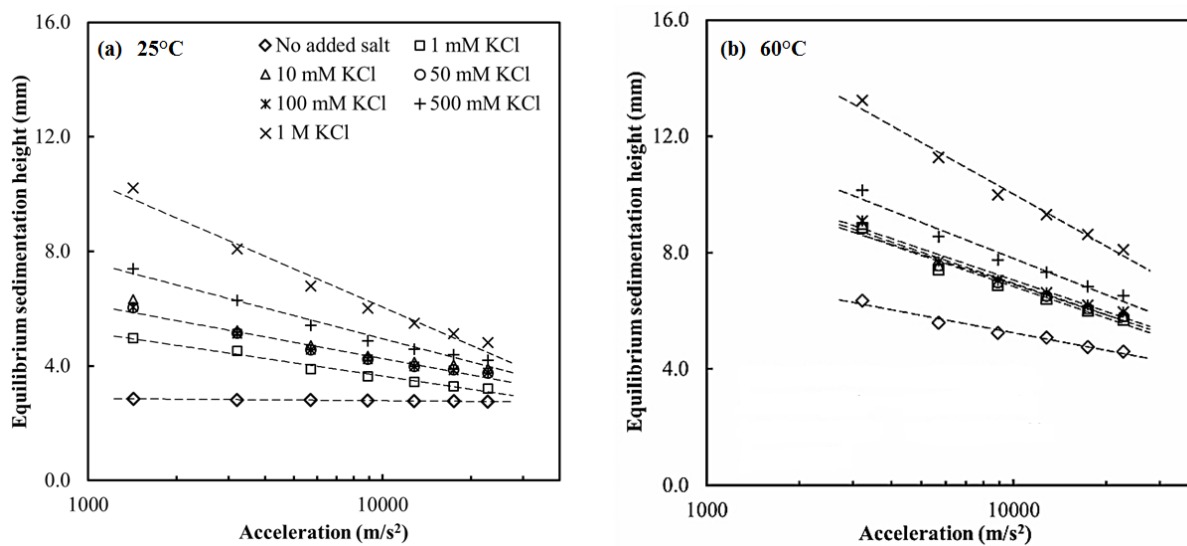

Figure S2.1: Equilibrium sedimentation height as a function of acceleration for 5 vol% PEGMA-stabilized polystyrene particle dispersions at varying electrolyte concentration at (a) 25°C and (b) 60°C, confirming the logarithmic decay of  $H_{eq}$  with acceleration in centrifugal field (Legend applicable to both graphs)
